# Supplementary material
Source: Springer Nature journal article supplement (https://www.springermedizin.de/resource/supplementary/12888_2009_580_MOESM1_ESM.pdf/9483654)
Supplement: MOESM1 [file 9483654]

Suicide attempters at the Yokohama City  
University Medical Center.  
2003-2008  
N = 686

Suicide completers  
N = 102

Suicide attempters  
N = 584

Lost to study  
Patients who are lack of information on the  
presence of family history of suicide  
N = 115

Patients with family history of suicide  
N = 70

Patients without family history of suicide  
N = 399
